# Supplementary material
Source: publisher figshare collection journal article supplement (https://karger.figshare.com/ndownloader/files/35099320)
Supplement: Supplementary file 1 [file 35099320]

| **Table S1**. Primers for polymerase cain reaction and direct sequencing | | | |
| --- | --- | --- | --- |
| Name | Direction | Sequence | Variants in the amplified sequence |
| Exon 1 | Fwd | GCTCGAGCCTCTCCTGCT | *E84K* |
| Rev | CACTCAGCACTGGATGAGGA |
| Exon 2-1 | Fwd | AAAACGGCACAGATGATTCC | *L110P, E148Q, R202Q* |
| Rev | AGGGCCTGCACTCCTTCT |
| Exon 2-2 | Fwd | GGGAAAGATGCGACCTAGAA | *G304R* |
| Rev | CTCAAAGTCTTGGCCTCCAG |
| Exon 3 | Fwd | CAGGAAGGAGACCCAGTTGA | *P369S, R408Q* |
| Rev | AAGTGCCTGGCAGAGAAGAG |
| Exon 5 | Fwd | AGGAAGCTGGAGCAGGTGTA | *S503C* |
| Rev | TGCAGAAGTTCCCATTCTGA |
| Exon 10 | Fwd | TTACTGGGAGGTGGAGGTTG | *M680I, M694I, M694V, V726A* |
| Rev | AGAGCAGCTGGCGAATGTAT |
| Primers used for PCR and direct sequence are shown. Primers were named by exon number, including the target MEFV variants. Since the region containing variants on exon 2 were distributed beyond the range that could be amplified by one set of primers, two sets of primers were used, exon 2-1 and exon 2-2. The sequences are represented in the 5' to 3' direction. The rightmost column shows the MEFV variants in the sequences amplified by the primers. Fwd and Rev mean forward and reverse, respectively. | | | |
